# Supplementary material
Source: publisher site journal article supplement (https://www.dovepress.com/article/514732)
Supplement: Supplementary file 1 [file get_supplementary_file.php]

**Appendix 1.**

| **Appendix 1. MeSH PubMed Search Strategy** | |
| --- | --- |
| Nu. | Boolean operators |
| Query Concept 1 | (("Chronic pain" OR ("chronic pain/epidemiology" OR "chronic pain/etiology" OR "chronic pain/therapy") OR "refractory pain" OR "pain, intractable" OR ("pain, intractable/epidemiology" OR "pain, intractable/etiology" OR "pain, intractable/therapy"))) |
| Query Concept 2 | (("Spinal cord stimulator" OR "spinal cord stimulation" OR "spinal cord stimulation/adverse effects" OR "electric stimulation therapy" OR "electrodes, implanted" OR "dorsal column stimulation")) |
| Query Concept 3 | (("Neuromodulation" OR "transcutaneous electric nerve stimulation" OR "transcutaneous electric nerve stimulation/adverse effects")) |
| Query Concept 4 | (("Explantation" OR "explant" OR "device removal" OR "replantation" OR "reoperation")) |
| Query Concept 5 | (("Postoperative complications" OR "infections" OR "surgical wound infection" OR "equipment failure" OR "migration" OR "failure")) |
| Main Query  1 AND 2 AND 3 AND 4 AND 5 | (("Chronic pain" OR ("chronic pain/epidemiology" OR "chronic pain/etiology" OR "chronic pain/therapy") OR "refractory pain" OR "pain, intractable" OR ("pain, intractable/epidemiology" OR "pain, intractable/etiology" OR "pain, intractable/therapy")) AND ("spinal cord stimulator" OR "spinal cord stimulation" OR "spinal cord stimulation/adverse effects" OR "electric stimulation therapy" OR "electrodes, implanted" OR "dorsal column stimulation") AND ("neuromodulation" OR "transcutaneous electric nerve stimulation" OR "transcutaneous electric nerve stimulation/adverse effects") AND ("explantation" OR "explant" OR "device removal" OR "replantation" OR "reoperation" OR "postoperative complications" OR "infections" OR "surgical wound infection" OR "equipment failure" OR "migration" OR "failure")) |
